# Supplementary material
Source: ML conference proceedings conference paper supplement (https://openaccess.thecvf.com/content/CVPR2025/html/Yin_Knowledge-Aligned_Counterfactual-Enhancement_Diffusion_CVPR_2025_paper.html)

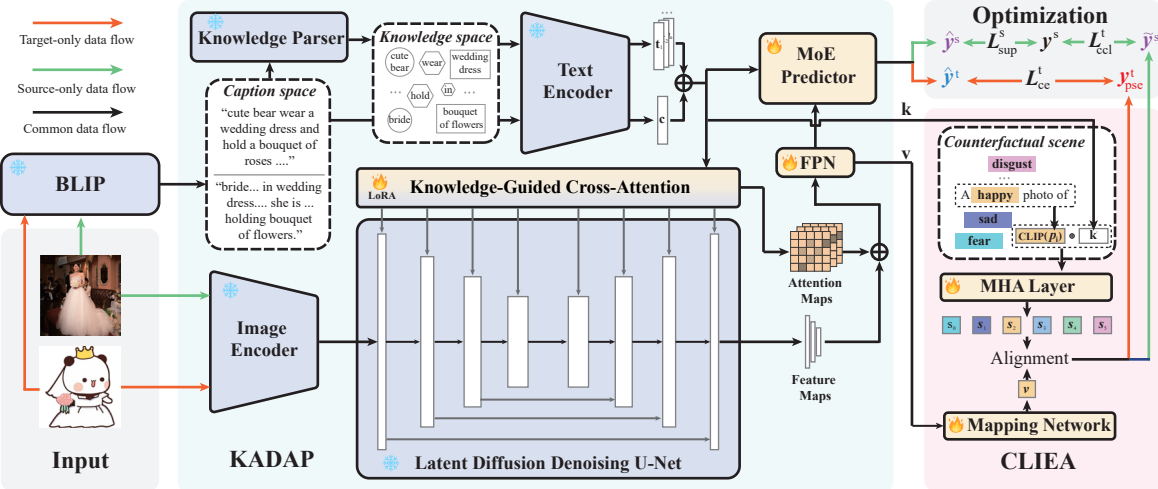

Supplement: Supplementary file 4 [file Yin_Knowledge-Aligned_Counterfactual-Enhancement_Diffusion_CVPR_2025_supplemental.zip]
